# Supplementary material for: The Detection and Morphological Analysis of Circulating Tumor and Host Cells in Breast Cancer Xenograft Models
Source: PubMed Central journal article supplement (PMC6679018; doi:10.3390/cells8070683), 2019-07-05
Supplement: cells-08-00683-s001.pdf [file cells-08-00683-s001.pdf]

## SUPPLEMENTARY MATERIALS

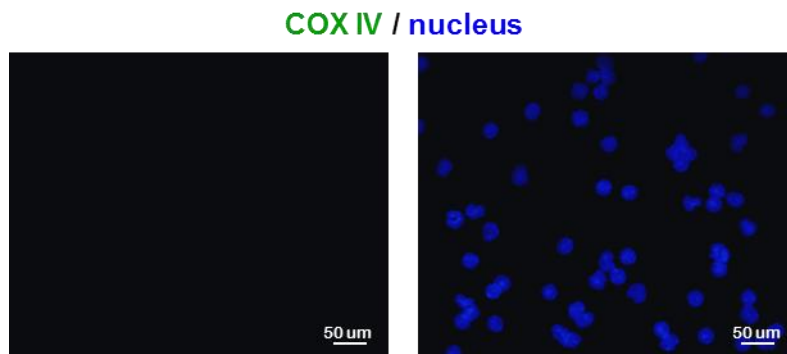

**Figure S1. Species-specificity of anti-human COX IV antibody.** Image represents spleen mononuclear cells from a BALB/c Nude mouse acquired by FITC (anti-COX IV antibody, *left*) and DAPI (nuclei, *right*) filters (40x oil immersion objective).

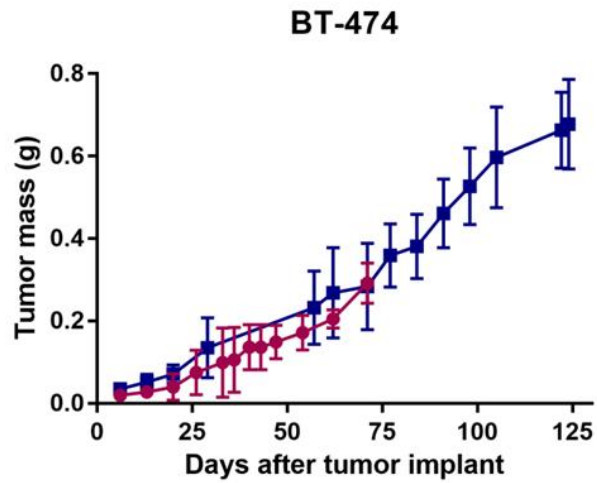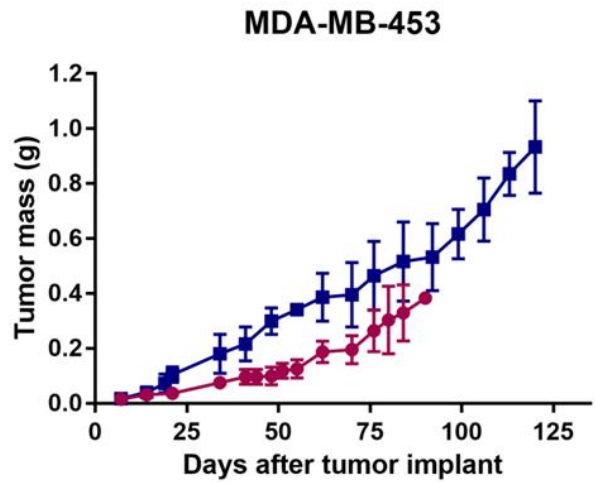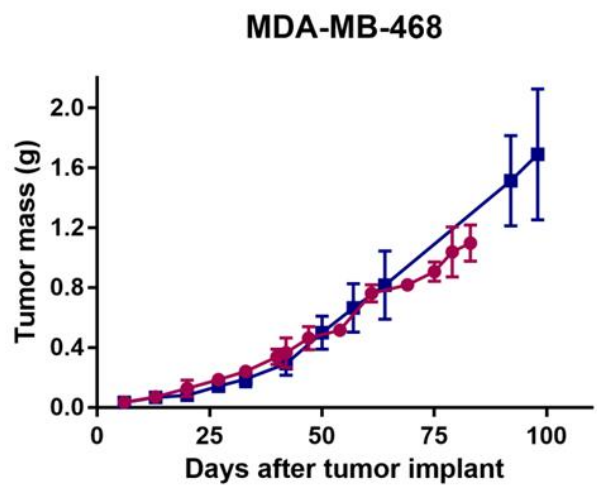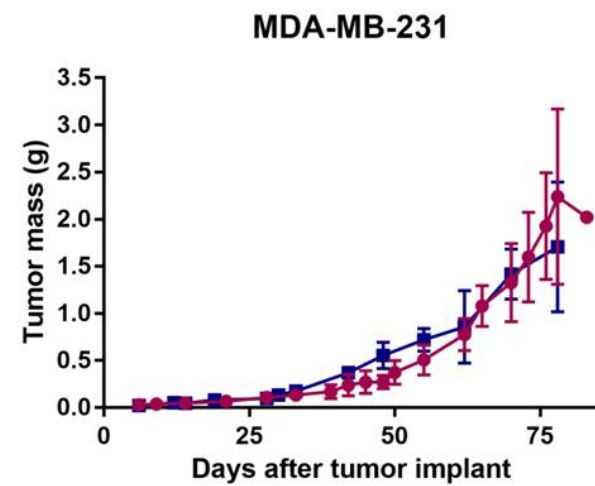

● Exp1    ■ Exp2

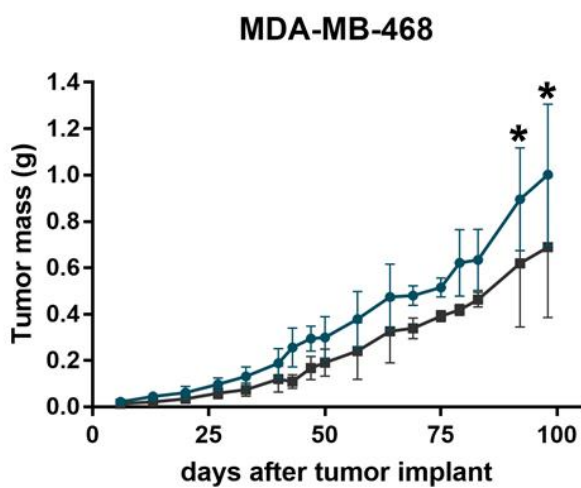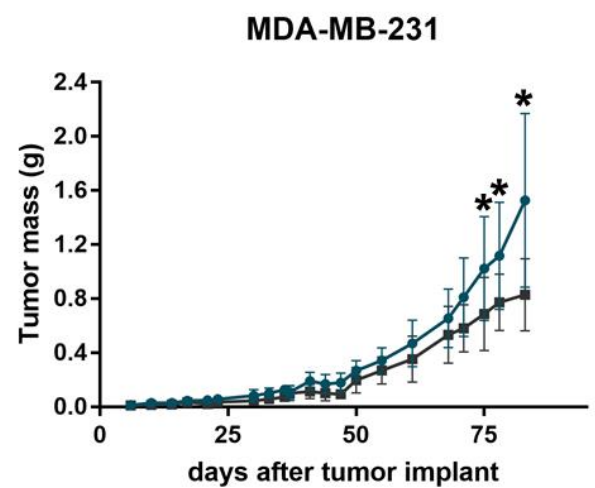

● axillary    ■ inguinal

**Figure S2.** Primary tumor growth in breast cancer xenograft models. Curves represent the mean $\pm$ SD mass of a single nodule for BT-474 and MDA-MB-453, the mean $\pm$ SD of the sum of the masses of two nodules for

MDA-MB-468 and MDA-MB-231, and the mean $\pm$ SD masses of matched axillary and inguinal nodules from MDA-MB-468 and MDA-MB-231 xenograft models, at different time points ("\*": adjusted p-value <0.01).

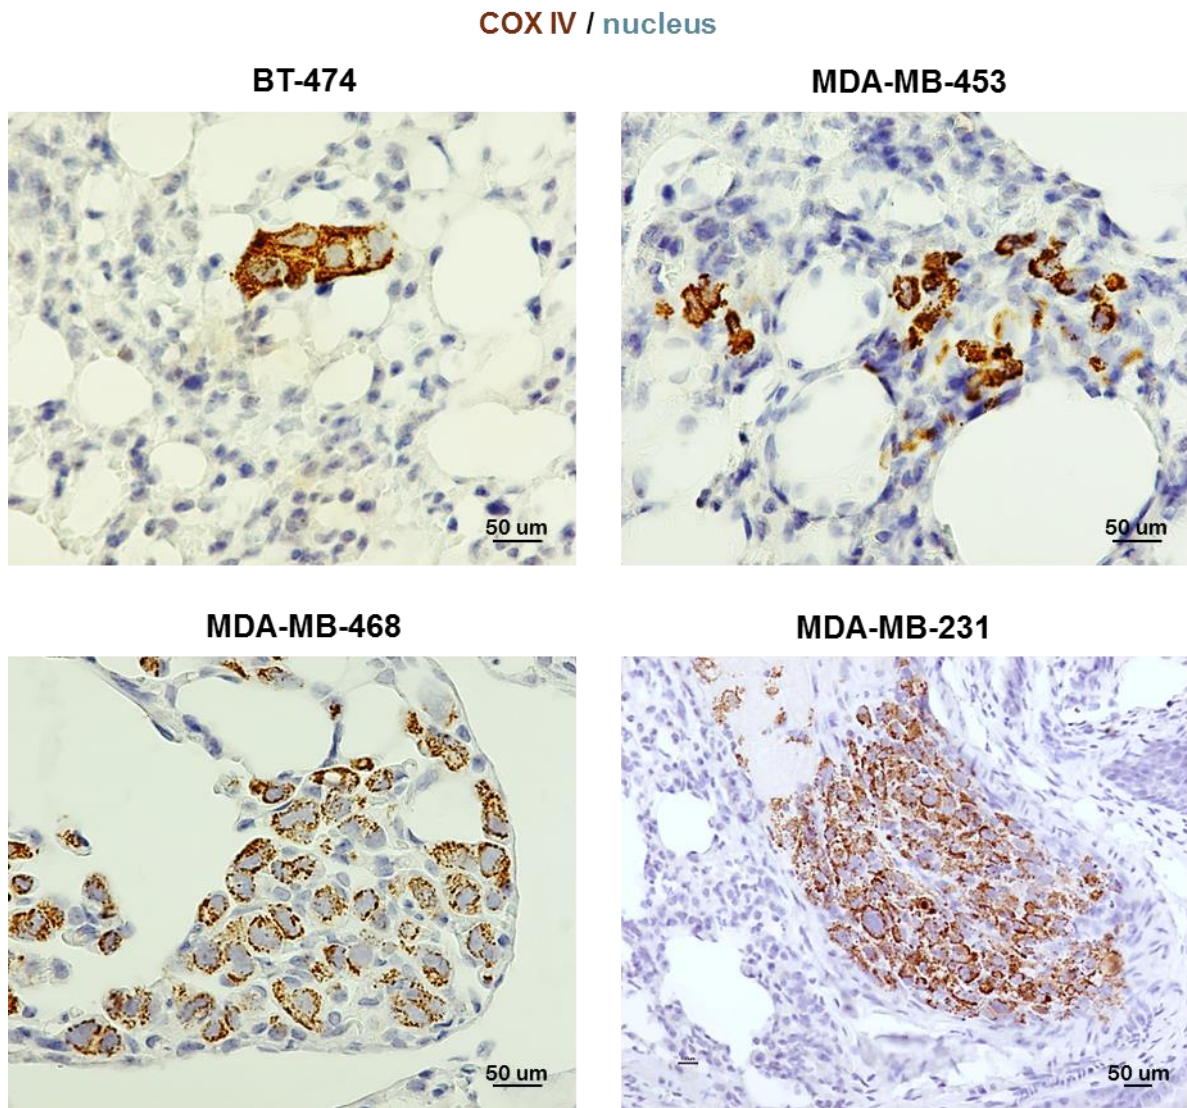

**Figure S3.** Lung metastases in breast cancer xenograft models. Images represent metastatic cell foci, with tumor cells showing cytoplasmic punctuated brown staining for COX IV and blue counterstained large nuclei, in lung samples from BT-474, MDA-MB-453, MDA-MB-468 (40x oil immersion objective) and MDA-MB-231 (20x objective) xenograft models.

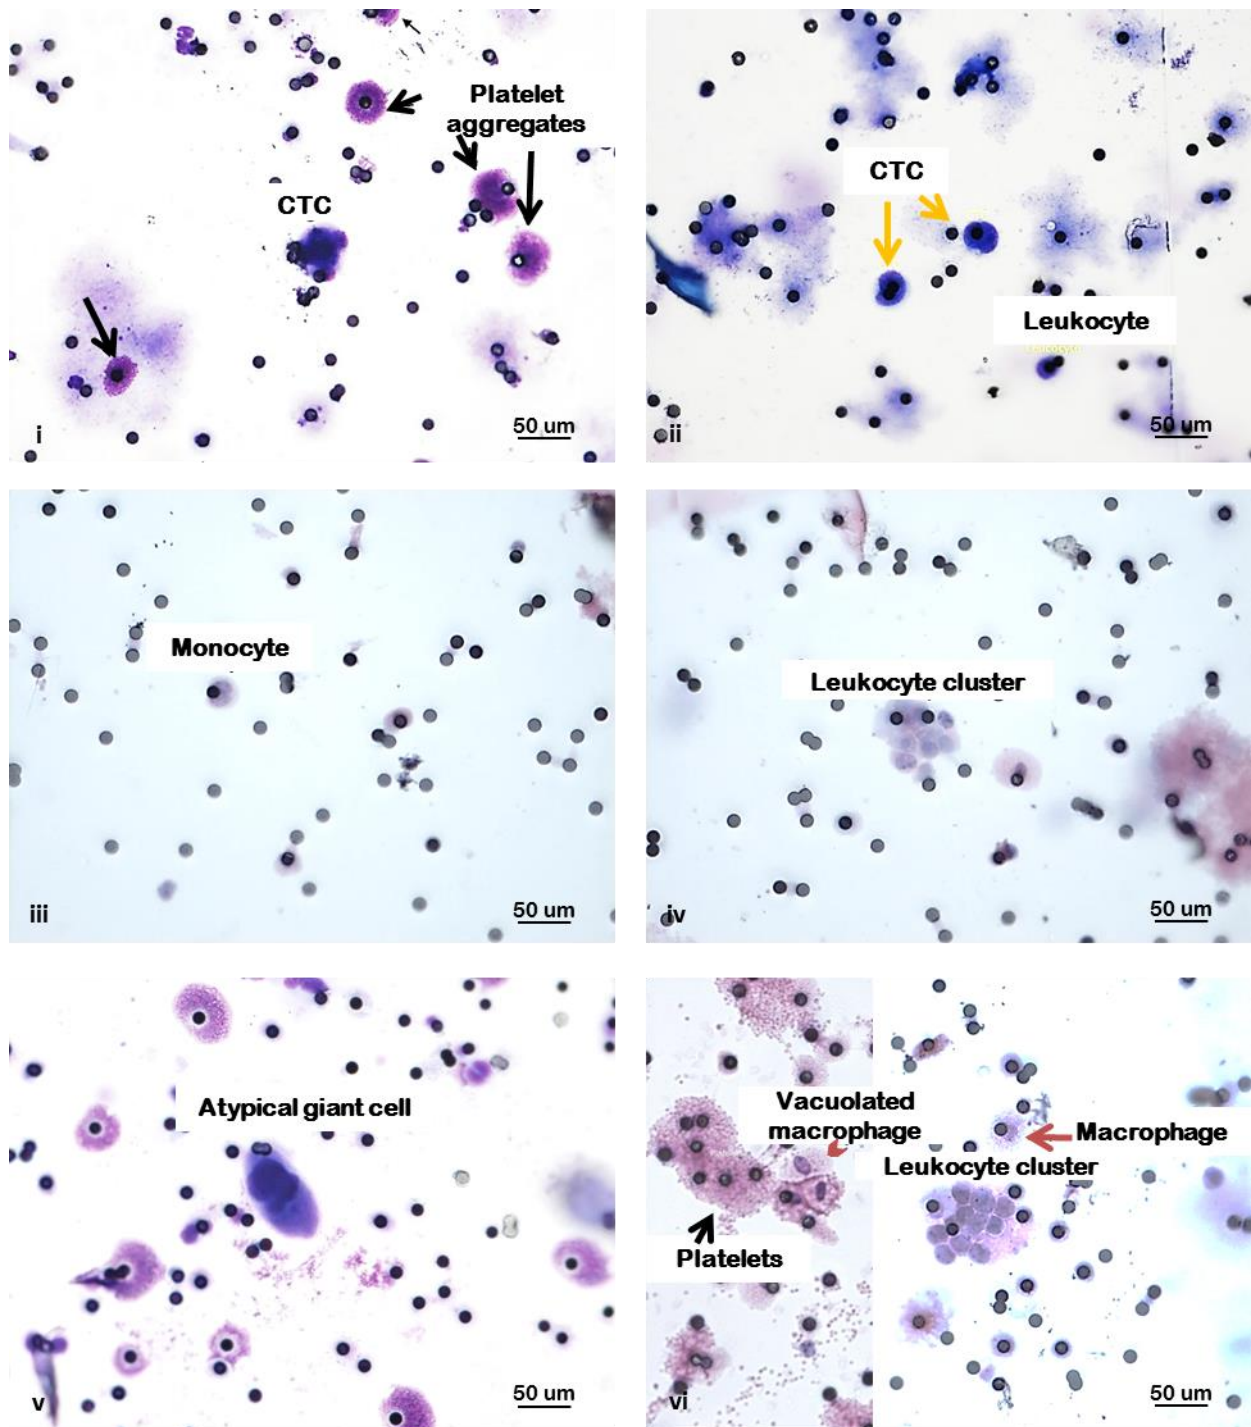

**Figure S4.** Cell types observed in cytological blood samples from breast cancer xenograft models. Images depict (i) platelet aggregates (black arrows) in MDA-MB-231 xenografts (40 objective), (ii) a single leukocyte, (iii) a monocyte, (iv) a cluster of leukocytes and (v) an atypical giant cell in MDA-MB-453 xenografts (40x objective), and (vi) a vacuolated macrophage in MDA-MB-453 (*left*) and a normal macrophage (*right*) in BT-474 xenografts (red arrows, 40x objective).

**Table S1. Circulating tumor cell (CTC) load in breast cancer xenograft models**

| CTC model         | median*(range) sCTC/mL |            |      |          | median*(range) cCTC/mL |             |      |         | overall mean±SD |               |
|-------------------|------------------------|------------|------|----------|------------------------|-------------|------|---------|-----------------|---------------|
|                   | Exp1                   |            | Exp2 |          | Exp1                   |             | Exp2 |         | sCTC/mL         | cCTC/mL       |
|                   | N**                    | sCTC       | N*   | sCTC     | N*                     | cCTC        | N**  | cCTC    |                 |               |
| <b>BT-474</b>     | 2                      | 0-2        | 7    | 1(1-5)   | 2                      | 0-2         | 6    | 0(0-2)  | 1.8±1.6         | 0.5±0.9       |
| <b>MDA-MB-453</b> | 3                      | 0-149      | 5    | 6(1-800) | 3                      | 0-1         | 5    | 0(0-1)  | 122.3±278.5     | 0.5±0.5       |
| <b>MDA-MB-468</b> | 3                      | 2-5        | 7    | 2(0-8)   | 3                      | 0-4         | 7    | 0(0-2)  | 3.5±2.6         | 1.1±1.5       |
| <b>MDA-MB-231</b> | 5                      | 7(0-9,625) | 6    | 2(0-417) | 6                      | 16(1-5,973) | 6    | 1(0-10) | 946.9±2,882.0   | 560.2±1,796.0 |

ABBREVIATIONS: sCTC: single circulating tumor cell; cCTC: CTC cluster; SD: standard deviation; Exp: experiment

\* if N≥5

\*\*number of cases assessable for sCTC or cCTC count according to sample quality

**Table S2. Circulating cells and metastases in xenograft models from breast cancer cell lines.**

| Cell line  | Exp n° | Sacrifice day | sCTC | cCTC | AGC | Other atypical cells and clusters                                                | Pulmonary metastases* | Lymph-nodal metastases* | Ovarian metastases* |
|------------|--------|---------------|------|------|-----|----------------------------------------------------------------------------------|-----------------------|-------------------------|---------------------|
| BT-474     | Exp 1  | 71            | pos  | pos  | neg | .                                                                                | NA                    | NA                      | NA                  |
| BT-474     | Exp 1  | 75            | neg  | neg  | neg | .                                                                                | NA                    | NA                      | NA                  |
| BT-474     | Exp 1  | 81            | NE   | NE   | NE  | .                                                                                | NA                    | NA                      | NA                  |
| BT-474     | Exp 2  | 91            | pos  | neg  | neg | .                                                                                | pos                   | neg                     | neg                 |
| BT-474     | Exp 2  | 91            | pos  | neg  | neg | .                                                                                | pos                   | neg                     | neg                 |
| BT-474     | Exp 2  | 105           | pos  | NE   | NE  | .                                                                                | pos                   | neg                     | neg                 |
| BT-474     | Exp 2  | 124           | pos  | pos  | neg | 1 CTCs-platelets cluster                                                         | pos                   | neg                     | neg                 |
| BT-474     | Exp 2  | 124           | pos  | neg  | neg | .                                                                                | pos                   | neg                     | neg                 |
| BT-474     | Exp 2  | 105           | pos  | neg  | neg | .                                                                                | pos                   | neg                     | neg                 |
| BT-474     | Exp 2  | 124           | pos  | neg  | neg | .                                                                                | pos                   | neg                     | neg                 |
| MDA-MB-453 | Exp 1  | 86            | pos  | neg  | neg | vacuolated macrophages; 1 CTC-platelet-leukocyte cluster; 1 mitotic figure (CTC) | neg                   | NA                      | neg                 |
| MDA-MB-453 | Exp 1  | 90            | neg  | pos  | neg | .                                                                                | pos                   | NA                      | neg                 |
| MDA-MB-453 | Exp 1  | 90            | pos  | pos  | neg | .                                                                                | pos                   | NA                      | neg                 |
| MDA-MB-453 | Exp 2  | 85            | pos  | neg  | neg | .                                                                                | pos                   | neg                     | pos                 |
| MDA-MB-453 | Exp 2  | 119           | pos  | pos  | neg | .                                                                                | pos                   | neg                     | pos                 |
| MDA-MB-453 | Exp 2  | 119           | pos  | pos  | pos | .                                                                                | pos                   | neg                     | pos                 |
| MDA-MB-453 | Exp 2  | 119           | pos  | neg  | neg | .                                                                                | pos                   | neg                     | pos                 |
| MDA-MB-453 | Exp 2  | 103           | NA   | NA   | NE  | .                                                                                | NA                    | NA                      | NA                  |
| MDA-MB-453 | Exp 2  | 103           | NE   | NE   | NE  | .                                                                                | pos                   | neg                     | pos                 |
| MDA-MB-453 | Exp 2  | 103           | pos  | neg  | neg | 2 mitotic figures (CTCs)                                                         | pos                   | neg                     | pos                 |
| MDA-MB-468 | Exp 1  | 85            | pos  | pos  | pos | 1 out of 4 CTCs-platelets cluster                                                | NA                    | neg                     | NA                  |
| MDA-MB-468 | Exp 1  | 85            | pos  | pos  | neg | .                                                                                | NA                    | neg                     | NA                  |
| MDA-MB-468 | Exp 1  | 85            | pos  | neg  | neg | .                                                                                | NA                    | neg                     | NA                  |
| MDA-MB-468 | Exp 2  | 92            | neg  | neg  | neg | .                                                                                | pos                   | pos                     | pos                 |
| MDA-MB-468 | Exp 2  | 92            | pos  | pos  | pos | .                                                                                | pos                   | pos                     | neg                 |
| MDA-MB-468 | Exp 2  | 98            | pos  | neg  | pos | .                                                                                | pos                   | pos                     | neg                 |
| MDA-MB-468 | Exp 2  | 98            | pos  | neg  | neg | .                                                                                | pos                   | pos                     | neg                 |

**Table S2. continued**

|            |       |    |     |     |     |                                                                                  |     |     |     |
|------------|-------|----|-----|-----|-----|----------------------------------------------------------------------------------|-----|-----|-----|
| MDA-MB-468 | Exp 2 | 98 | pos | neg | neg | .                                                                                | pos | pos | neg |
| MDA-MB-468 | Exp 2 | 98 | pos | pos | neg | 1 CTCs-platelets cluster                                                         | pos | pos | neg |
| MDA-MB-468 | Exp 2 | 98 | pos | neg | neg | .                                                                                | pos | pos | pos |
| MDA-MB-231 | Exp 1 | 28 | NE  | NE  | NE  | .                                                                                | neg | neg | NA  |
| MDA-MB-231 | Exp 1 | 35 | neg | NE  | NE  | .                                                                                | neg | neg | NA  |
| MDA-MB-231 | Exp 1 | 35 | pos | pos | neg | .                                                                                | pos | neg | NA  |
| MDA-MB-231 | Exp 1 | 35 | neg | neg | neg | .                                                                                | neg | pos | NA  |
| MDA-MB-231 | Exp 1 | 36 | neg | neg | neg | .                                                                                | neg | pos | NA  |
| MDA-MB-231 | Exp 1 | 35 | neg | NE  | neg | .                                                                                | neg | pos | NA  |
| MDA-MB-231 | Exp 1 | 50 | pos | pos | neg | .                                                                                | neg | neg | NA  |
| MDA-MB-231 | Exp 1 | 50 | neg | pos | neg | Numerous CTCs mixed with leukocytes                                              | pos | neg | NA  |
| MDA-MB-231 | Exp 1 | 50 | neg | neg | neg | .                                                                                | neg | pos | NA  |
| MDA-MB-231 | Exp 1 | 50 | NE  | NE  | NE  | .                                                                                | pos | pos | NA  |
| MDA-MB-231 | Exp 1 | 50 | NE  | NE  | NE  | .                                                                                | pos | pos | NA  |
| MDA-MB-231 | Exp 1 | 49 | NE  | pos | pos | .                                                                                | neg | pos | NA  |
| MDA-MB-231 | Exp 1 | 62 | pos | pos | NE  | 1 CTCs-leukocytes cluster; 3 CTCs-platelets clusters; presence of apoptotic CTCs | pos | pos | NA  |
| MDA-MB-231 | Exp 1 | 62 | neg | pos | pos | .                                                                                | pos | neg | NA  |
| MDA-MB-231 | Exp 1 | 65 | neg | pos | neg | .                                                                                | pos | pos | NA  |
| MDA-MB-231 | Exp 1 | 65 | pos | pos | neg | .                                                                                | pos | pos | NA  |
| MDA-MB-231 | Exp 1 | 65 | neg | pos | pos | 2 apoptotic CTCs                                                                 | neg | neg | NA  |
| MDA-MB-231 | Exp 1 | 65 | pos | pos | pos | 2 apoptotic CTCs                                                                 | pos | pos | NA  |
| MDA-MB-231 | Exp 1 | 83 | pos | pos | neg | .                                                                                | pos | pos | NA  |
| MDA-MB-231 | Exp 1 | 84 | neg | pos | neg | .                                                                                | pos | pos | NA  |
| MDA-MB-231 | Exp 1 | 83 | pos | pos | pos | 1 CTCs-leukocytes cluster                                                        | pos | pos | NA  |
| MDA-MB-231 | Exp 1 | 83 | pos | pos | neg | .                                                                                | pos | neg | NA  |
| MDA-MB-231 | Exp 1 | 84 | pos | pos | neg | .                                                                                | pos | pos | NA  |
| MDA-MB-231 | Exp 2 | 77 | pos | pos | neg | .                                                                                | pos | pos | NA  |
| MDA-MB-231 | Exp 2 | 77 | pos | pos | neg | .                                                                                | pos | pos | NA  |
| MDA-MB-231 | Exp 2 | 77 | pos | neg | neg | .                                                                                | pos | pos | NA  |

**Table S2. continued**

|            |       |    |     |     |     |                           |     |     |    |
|------------|-------|----|-----|-----|-----|---------------------------|-----|-----|----|
| MDA-MB-231 | Exp 2 | 79 | neg | neg | neg | .                         | pos | pos | NA |
| MDA-MB-231 | Exp 2 | 79 | pos | neg | neg | .                         | pos | pos | NA |
| MDA-MB-231 | Exp 2 | 77 | pos | pos | neg | 4 CTCs-platelets clusters | pos | pos | NA |

ABBREVIATIONS: CTC: circulating tumor cell; sCTC: single CTC; cCTC: CTC cluster; AGC: atypical giant cell; NA: not available; NE: not evaluable; Exp: experiment

\* data refers to results of immunohistochemistry analysis
